# Supplementary material for: Electromechanical polyaniline–cellulose hydrogels with high compressive strength
Source: Royal Society of Chemistry journal article supplement (doi:10.1039/c3sm51490k), 2013-01-01
Supplement: c3sm51490k.pdf [file c3sm51490k.pdf]

**Supplementary Information for:**

## **Electromechanical Polyaniline /Cellulose Hydrogels with High Compressive Strength**

**Xingwei Shi<sup>a</sup>, Yanli Hu<sup>a</sup>, Kai Tu<sup>a</sup>, Lina Zhang<sup>a\*</sup>, Hao Wang<sup>b</sup>, Jian Xu<sup>b</sup>, Hongming Zhang<sup>c</sup>, Ji Li<sup>c</sup>, Xianhong Wang<sup>c</sup>, Min Xu<sup>d</sup>**

<sup>a</sup>Department of Chemistry, Wuhan University 430072, China. E-mail: lnzhang@public.wh.hb.cn. Tel: +86-27-87219274. Fax: +86-27-68762005

<sup>b</sup>Beijing National Laboratory for Molecular Sciences, Laboratory of Polymer Physics and Chemistry, Institute of Chemistry, Chinese Academy of Sciences, Beijing 100190, China

<sup>c</sup>Key Lab of Polymer Ecomaterials, Chinese Academy of Sciences, Changchun Institute of Applied Chemistry, 130022, China

<sup>d</sup>State Key Laboratory of Precision Spectroscopy, East China Normal University, Shanghai 200062, China

### **Experimental Section**

Hydrogels without cross-linker were prepared and tested by using the same process and condition of crosslinking hydrogels. The same mass of PANI powder with hydrogels was added to 100 g of the mixture solution with NaOH/urea/H<sub>2</sub>O ratio of 7:12:81 by weight, and then 4 mL ECH as cross-linker was added to the suspension solution, stirred at room temperature for 25 min to obtain a solution, and were centrifuged to obtain the wet powder, The wet powder was wash with alcohol and distilled water to remove superfluous epichlorohydrin and residue. The powder sample was dried under vacuum at 55°C for 24 h to remove any moisture before use.

### **Characterization**

Infrared spectra of pure polyaniline and polyaniline dealt with cross-linker were recorded with a Fourier transform infrared (FT-IR) spectrometer (Thermo Nicolet iS10).

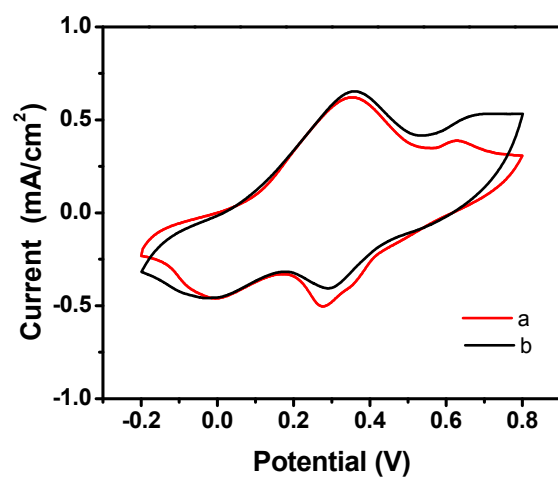

Figure S1. Cyclic voltammograms of H25 hydrogels (a) and PANI/cellulose hydrogels without the cross-linker (b) in 1 M H<sub>2</sub>SO<sub>4</sub> solution, at a scan rate = 100 mVs<sup>-1</sup>.

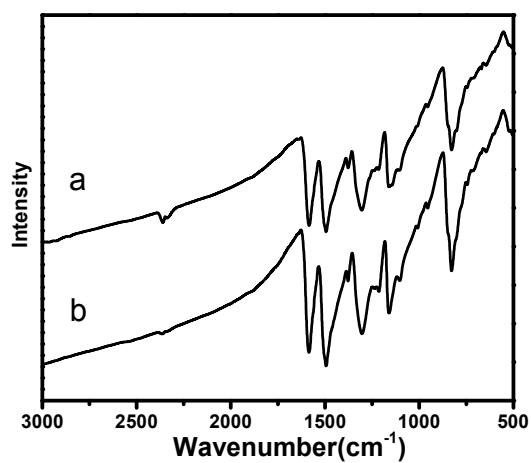

Figure S2. FT-IR spectra of pure PANI (a), and PANI dealt with cross-linker (b).
